# Supplementary material for: Latent Drug Recognition Using Fuzzy Matching in Sequential Analysis of Full-Text Health Related Publications: Case of a Health Dissemination tool in a developing country
Source: Research Square preprint supplement (doi:10.21203/rs.3.rs-3068622/v1), 2023-06-26
Supplement: Supplementary file 1 [file 68e650af1759f809d15241c0.docx]

**Table I: Shows the transformation of results from the inputted multi-search medical terms to output**

| **Manually Typed Search Terms** | *Inputs: acetylsalicylic acid+Ticagrelor+imiquimod* | | | |
| --- | --- | --- | --- | --- |
| **Processed Inputs** | *Processed Inputs: ['acetylsalicylic acid', 'ticagrelor', 'imiquimod']* | | | |
|  |  |  |  |  |
| **Drug Searched** | **CommonName and Synonym** | **List of papers and Sentences containing either CommonName or Synonym** | **Other Drugs found in the extracted Sentences** | **Sentence Extracted** |
| acetylsalicylic acid | Common Name:  Acetylsalicylic acid  Synonyms : ['2-Acetoxybenzenecarboxylic acid', '2-Acetoxybenzoic acid', 'Acetylsalicylate', 'Acetylsalicylsäure', 'acide 2-(acétyloxy)benzoïque', 'Acide acétylsalicylique', 'ácido acetilsalicílico', 'Acidum acetylsalicylicum', 'ASA', 'Aspirin', 'Aspirina', 'Azetylsalizylsäure', 'o-acetoxybenzoic acid', 'O-acetylsalicylic acid', 'o-carboxyphenyl acetate', 'Polopiryna', 'Salicylic acid acetate'] | paperID 48 sentID 19 | ['aspirin', 'clopidogrel', 'atorvastatin', 'rosuvastatin', 'rosuvastatin', 'aspirin', 'clopidogrel'] | patients will take aspirin clopidogrel and high-intensity statins ( atorvastatin or rosuvastatin ) within 24 hours of stroke onset followed by aspirin or clopidogrel alone from day 22 . |
| paperID 529 sentID 5 | ['diclofenac', '-fluorouracil', '-fluorouracil', 'acetylsalicylic acid', 'imiquimod', 'ingenol mebutate'] | topical therapies allow the treatment of a whole area of affected skin and currently include diclofenac sodium gel 5 -fluorouracil cream 5 -fluorouracil and acetylsalicylic acid solution imiquimod cream and ingenol mebutate gel . |
| paperID 745 sentID 36 | ['alcohol', 'aspirin'] | ( 12 ) the clinical backgrounds and comor‐ bidities such as age sex smoking alcohol consumption anthra‐ noid use aspirin use diabetes mellitus inflammatory bowel disease parkinson’s disease and hypothyroidism related to colorectal neoplasms or mc were investigated using electronic medical records . |
| paperID 1002 sentID 10 | ['acetylsalicylic acid', 'ticagrelor'] | after anterior myocardial infarction was diagnosed 300 mg acetylsalicylic acid and 180 mg ticagrelor loading doses were given . |
| paperID 1002 sentID 28 | ['acetylsalicylic acid', 'acetylsalicylic acid'] | loading doses of 300 mg acetylsalicylic acid and 180 mg ticagrelor were given . |
| paperID 1088 sentID 3 | ['naproxen', 'aspirin', 'ketoprofen'] | this study was aimed at conducting a network meta-analysis to assess the efficacy and safety of 5 otcas – naproxen ibuprofendiclofenac aspirin and ketoprofen – in patients with primary dysmenorrhea . |
| paperID 1088 sentID 8 | ['aspirin', 'naproxen', 'ibuprofen', 'diclofenac', 'ketoprofen'] | as for efficacy outcomes all the included analgesics except aspirin were more effective than placebo in treating dysmenorrhea [naproxen ( or 3 . 99 95 % ci 2 . 18 –7 . 30 ) ibuprofen ( or 10 . 08 95 % ci 3 . 29 –30 . 85 ) diclofenac ( or 11 . 82 95 % ci 2 . 66 –52 . 48 ) and ketoprofen ( or 5 . 12 95 % ci 1 . 57 –16 . 69 ) . |
| paperID 1088 sentID 10 | ['aspirin', 'ibuprofen', 'diclofenac'] | aspirin was less effective than ibuprofen ( or 0 . 17 95 % ci 0 . 04 –0 . 73 ) and diclofenac ( or 1 . 17 95 % ci 0 . 02 –0 . 85 ) . |
| paperID 1088 sentID 11 | ['diclofenac', 'ibuprofen', 'ketoprofen', 'naproxen', 'aspirin'] | the sucra curves showed that diclofenac and ibuprofen were the most and second most effective ( 85 . 1 % and 83 . 8 % respectively ) followed by ketoprofen naproxen and aspirin . |
| paperID 1088 sentID 13 | ['diclofenac', 'ibuprofen', 'ketoprofen', 'diclofenac', 'ketoprofen', 'aspirin'] | diclofenac versus ibuprofen ( or 4 . 31 95 % ci 1 . 18 – 15 . 67 ) ketoprofen versus diclofenac ( or 0 . 18 95 % ci 0 . 04 –0 . 78 ) and ketoprofen versus aspirin ( or 0 . 41 95 % ci 0 . 18 –0 . 97 ) presented statistically significant differences . |
| paperID 1088 sentID 14 | ['ketoprofen', 'ibuprofen', 'naproxen', 'aspirin', 'diclofenac'] | ketoprofen and ibuprofen were ranked the best ( sucra 90 . 6 % and 79 . 6 % ) followed by naproxen aspirin and diclofenac . |
| paperID 1217 sentID 14 | ['heparins', 'bivalirudin', 'aspirin'] | guidelines recommend the use of adjunctive therapies during ppci including anticoagulants ( heparins and bivalirudin ) and antiplatelet activation drugs ( aspirin and p2 y12 inhibitors ) . |
| paperID 1319 sentID 2 | ['acide acétylsalicylique', 'apixaban'] | 2 les antithrombotiques ne sont pas recommandés pour la thromboprophylaxie chez les patients atteints de covid-19 légère non hospitalisés dans un essai randomisé et contrôlé cessé prématurément en raison de taux d’événements moindres que prévu ni l’acide acétylsalicylique ( aas ) ni l’apixaban ( à des doses prophylactiques ou thérapeutiques ) n’ont réduit les taux d’événements cardiovasculaires ou pulmonaires majeurs comparativement au placebo chez des patients atteints de covid-19 légère non hospitalisés23 . |
| paperID 1319 sentID 6 | ['acide acétylsalicylique'] | 5 l’acide acétylsalicylique n’améliore pas l’issue chez les patients hospitalisés non sélectionnés l’aas n’est pas recommandé pour prévenir la mortalité ou le recours au soutien des fonctions vitales chez les patients hospitalisés pour la covid-19 non sélectionnés36 . |
| paperID 1352 sentID 1 | ['nattokinase', 'nattokinase', 'aspirin'] | 221 lab anim res 2013 : 29 ( 4 ) 221 -225 [http://dx](http://dx/) . doi . org/10 . 5625 /lar . 2013 . 29 . 4 . 221 nattokinase improves blood flow by inhibiting platelet aggregation and thrombus formation ja-young jang1 # tae-su kim2 # jingmei cai1 jihyun kim1 youngeun kim1 kyungha shin1 kwang sei kim1 sung kyeong park3 sung-pyo lee2 ehn-kyoung choi1 man hee rhee4 * yun-bae kim1 * 1 college of veterinary medicine chungbuk national university cheongju korea 2 misuba rtech co . ltd . asan korea 3 daejeon health sciences college daejeon korea 4 college of veterinary medicine kyungpook national university daegu korea the effects of nattokinase on the in vitro platelet aggregation and in vivo thrombosis were investigated in comparison with aspirin . |
| paperID 1352 sentID 8 | ['nattokinase', 'aspirin'] | in addition a high dose ( 500 mg/kg ) of nattokinase fully prevented the occlusion as achieved with aspirin ( 30 mg/kg ) . |
| paperID 1615 sentID 8 | ['aspirin'] | aspirin may also be effective for patients with ischemic stroke who have contraindications to anticoagulants although direct comparisons with anticoagulants are not available . |
| paperID 1764 sentID 15 | ['aspirin'] | in 1971 vane[5 ] demonstrated that aspirin mdomethacin and other non-steroid anti-inflammatory drugs inhibited the synthesis of prostaglandins and he postulated that these drugs owed their anti-inflammatory anti-pyretjc ancj analgesic actions to their ability to inhibit pg biosynthesis . |
| paperID 2435 sentID 9 | ['aspirin'] | interventions: the patient was administered g-globulin 1 . 0 g/kg·d for 2 consecutive days and oral aspirin 5 mg/kg·d . |
| paperID 2435 sentID 11 | ['aspirin'] | the dose of aspirin was reduced to 3 mg/kg·d after 2 months and to 1 . 5 mg/kg·d after 3 months . |
| paperID 2703 sentID 13 | ['aspirin'] | to prevent thrombus formation or attempt to resolve an existing thrombus low molecular weight heparin ( schwarzwald et al . 2002 ; feige et al . 2003 ) acetylsalicylic acid ( schoster 2017 ) and recombinant tissue plasminogen activator ( bäumer et al . 2013 ) have been proposed as systemic treatments . |
| paperID 2791 sentID 15 | ['aspirin'] | she received dual antiplatelet therapy for 1 year followed by lifelong aspirin in addition to high-intensity statin and a beta-blocker . |
| paperID 2799 sentID 26 | ['aspirin'] | similar effect modification was observed for aspirin ( or 1 . 90 ; 95 %ci 0 . 77 to 4 . 70 for non-users and or 1 . 02 ; 95 %ci 0 . 34 to 3 . 08 for users ) and β-blockers . 2 these findings raise questions about the role of coronary circulation in cold-related pathogenesis of scd . |
| paperID 2939 sentID 17 | ['aspirin', 'cilostazol', 'prednisolone'] | since the pci she has been taking aspirin 100 mg; clopidogrel 75 mg and cilostazol 100 mg for coronary artery disease treatment and prednisolone 5 mg and hydroxyquinolone for lupus treatment . |
| paperID 2989 sentID 15 | ['aspirin'] | • aspirin is not recommended for patients with congestive heart failure ( chf ) . |
| paperID 3036 sentID 23 | ['aspirin', 'atenolol', 'furosemide', 'furosemide', 'budesonide', 'albuterol', 'umeclidinium', 'umeclidinium'] | his outpatient medication includes aspirin atenolol furosemide budesonide nebuliser albuterol and umeclidinium inhaler . |
| paperID 3241 sentID 5 | ['aspirin'] | we correlate the influence of chronic statin therapy ( at least 6 months ) with factors including age up to 50 years helicobacter pylori infection smoking and drinking habits ulcer history gastrotoxic drug consumption ( low-dose aspirin [asa] anticoagulants ) and comorbidities . |
| paperID 3241 sentID 12 | ['aspirin', 'nitric oxide', 'pge2', 'pgi2', 'pgi2'] | abbreviations: asa = low-dose aspirin ci = confidence interval hf = heart failure no = nitric oxide nsaids = non-steroidal anti-inflammatory drugs ors = odds ratio pge2 = prostaglandin e2 pgi2 = prostaglandin i2 ppi = proton pomp inhibitors sat = systemic atherosclerosis . |
| paperID 3241 sentID 13 | ['aspirin'] | keywords: comorbidities endoscopic lesions helicobacter pylori low-dose aspirin statin 1 . |
| paperID 3382 sentID 16 | ['cascades', 'arachidonic acid', 'adenosine diphosphate', 'adenosine', 'adenosine', 'camp', 'cyclic adenosine monophosphate', 'adenosine monophosphate', 'adenosine', 'adenosine', 'acetylsalicylic acid', 'adenosine triphosphate', 'adenosine', 'adenosine', 'calcium', 'inositol-', 'platelet-activating factor', 'prothrombin', 'tyrosine'] | generally platelet activation is triggered by several intracellular signaling cascades stimulated by different adhesive proteins and abbreviations: aa arachidonic acid; adp adenosine diphosphate; ac adenylyl cyclase; camp cyclic adenosine monophosphate; asa acetylsalicylic acid; atp adenosine triphosphate; akt protein kinase b; [ca2 þ]i intracellular calcium ion; cox cyclooxygenase; crp collagen-related peptide; csf crude saponin fraction; erk extracellular signaleregulated kinase; gpvi glycoprotein vi; ic50 half maximal ( 50 % ) inhibitory concentration; ip3 inositol-145 -triphosphate; jnk c-jun n-terminal kinase; mapk mitogen-activated protein kinase; mkk4 mitogen-activated protein kinase 4 ; mlc myosin light chain; paf platelet-activating factor; par proteinase-activated receptor; pi3 k phosphatidylinositol 3 -kinase; pka protein kinase a; pkc protein kinase c; pkg protein kinase g; cpla2 a cytosolic phospholipase a2 a; pla2 phospholipase a2 ; plcg2 phospholipase c gamma-2 ; aptt activated partial thromboplastin time; pt prothrombin time; ppd protopanaxadiol; ppt protopanaxatriol; rock rho-associated protein kinase; sfk src family kinase; syk spleen tyrosine kinase; ts total saponin; txa2 thromboxane a2 ; txb2 thromboxane b2 ; txas thromboxane-a synthase; txr thromboxane receptor; vasp vasodilator-stimulated phosphoprotein; vwf von willebrand factor . |
| paperID 3407 sentID 23 | ['aspirin'] | during workup patient complained of transient right sided face and arm tingling diagnosed with tia and started on aspirin . |
| paperID 3423 sentID 13 | ['vonoprazan', 'simvastatin', 'simvastatin', 'cholesterol', 'simvastatin', 'simvastatin', 'simvastatin', 'verapamil', 'apatinib', 'vonoprazan', 'potassium', 'aspirin'] | aphy-tandem mass spectrometry rat liver microsomes introduction as one of the drugs with wide clinical application simvastatin is mainly used to treat dyslipidemia and it can reduce the concentrations of total cholesterol triglyceride and low-density lipoprotein ( ldl ) in plasma accomplished by increasing the concentration of high-density lipoprotein ( hdl ) . 1 it has been reported that simvastatin is the substrates for cytochrome p450 ( cyp ) enzymes p-glycoprotein ( p-gp ) and organic anion-transporting polypeptide transporter ( oatp1 b1 ) and it is mainly metabolized via cyp3 a4 /5 with cyp2 c8 /9 /19 and cyp2 d6 also involved in partial metabolism . 2 recently drug– drug interactions between simvastatin and other drugs were reported such as simvastatin could inhibit the metabolism of verapamil and apatinib and increase their bioavailability by inhibiting cyp3 a and p-glycoprotein ( p-gp ) efflux pumps . 34 vonoprazan a potassium-competitive acid blocker ( p-cab ) is a novel reversible proton pump inhibitor ( ppi ) that is used for the treatment or the prevention of gastric acid-related clinical conditions such as erosive esophagitis gastroesophageal reflux gastroduodenal ulcer aspirin or nsaid-induced peptic ulcer and it can also be used for the eradication of helicobacter drug design development and therapy 2022 :16 1779 –1789 1779 © 2022 hong et al . |
| paperID 3491 sentID 13 | ['warfarin', 'aspirin', 'warfarin'] | two patients changed their treatment from warfarin to aspirin; others remained on warfarin . |
| paperID 3503 sentID 13 | ['aspirin', 'clopidogrel', 'metoprolol'] | she was started on aspirin clopidogrel and metoprolol . |
| ticagrelor | Common Name:  Ticagrelor  Synonyms :  ['(1S-2S-3R-5S)-3-(7-((1R-2S)-2-(3-4-Difluorophenyl)cyclopropylamino)-5-(propylthio)-3H-(1-2-3)triazolo(4-5-d)pyrimidin-3-yl)-5-(2-hydroxyethoxy)cyclopentane-1-2-diol', 'Ticagrelor'] | paperID 1002 sentID 1 | ['ticagrelor'] | 60 case reports diffuse alveolar hemorrhage associated with ticagrelor therapy after percutaneous coronary intervention samet yılmaz oğuz kılıç yalın tolga yaylalı department of cardiology pamukkale university hospitals; denizli-turkey introduction after acute coronary syndrome ( acs ) various antiplatelet agents are used to prevent stent thrombosis death and recurrent myocardial infarction . |
| paperID 1002 sentID 2 | ['clopidogrel', 'prasugrel', 'ticagrelor'] | the currently available antiplatelet agents are clopidogrel prasugrel and ticagrelor . |
| paperID 1002 sentID 3 | ['ticagrelor'] | the european society of cardiology guidelines recommend ticagrelor as a first choice antiplatelet regimen after acs ( 1 ) . |
| paperID 1002 sentID 6 | ['ticagrelor', 'ticagrelor'] | although dyspnea is frequently reported in patients receiving ticagrelor dah due to ticagrelor use is very rare in the literature ( 2 3 ) . |
| paperID 1002 sentID 7 | ['ticagrelor'] | thus we present two cases of antiplatelet-related dah occurring after ticagrelor therapy . |
| paperID 1002 sentID 10 | ['acetylsalicylic acid', 'ticagrelor'] | after anterior myocardial infarction was diagnosed 300 mg acetylsalicylic acid and 180 mg ticagrelor loading doses were given . |
| paperID 1002 sentID 20 | ['ticagrelor'] | based on radiological findings dah due to ticagrelor emerged as the most obvious reason for hemoptysis . |
| paperID 1002 sentID 21 | ['ticagrelor', 'oxygen'] | ticagrelor was stopped and continuous oxygen inhalation was started at 2 l/min . |
| paperID 1002 sentID 24 | ['clopidogrel', 'ticagrelor'] | clopidogrel instead of ticagrelor was started as the second antiaggregant therapy and the patient was discharged from the hospital on the 7 th day . |
| paperID 1768 sentID 24 | ['ticagrelor', 'clopidogrel'] | ticagrelor was used in 27 patients and clopidogrel in 3 as the dual antiplatelet . |
| imiquimod | Common Name:  Imiquimod  Synonyms :  ['1-isobutyl-1H-imidazo[4-5-c]quinolin-4-amine', '4-Amino-1-isobutyl-1H-imidazo(4-5-c)quinoline', 'Imiquimod', 'Imiquimodum'] | paperID 529 sentID 4 | ['diclofenac', 'ingenol mebutate', 'imiquimod'] | with an approach focused on the photo-damaged skin instead of single lesions topical therapies have the advantage over surgical or ablative therapies of treating subclinical lesions as well with recent evidence showing the latter also have the ability to degenerate into scc . 2 cost-efficacy analysis of 3 % diclofenac sodium ingenol mebutate and 3 . 75 % imiquimod in the treatment of actinic keratosis steven nisticò1 ester del duca1 valeria torchia2 micaela gliozzi2 ugo bottoni1 and carolina muscoli3 abstract actinic keratosis ( ak ) is a clinical condition characterized by keratinocytic dysplastic lesions of the epidermis affecting individuals chronically exposed to sunlight . |
| paperID 529 sentID 5 | ['diclofenac', '-fluorouracil', '-fluorouracil', 'acetylsalicylic acid', 'imiquimod', 'ingenol mebutate'] | topical therapies allow the treatment of a whole area of affected skin and currently include diclofenac sodium gel 5 -fluorouracil cream 5 -fluorouracil and acetylsalicylic acid solution imiquimod cream and ingenol mebutate gel . |
| paperID 529 sentID 6 | ['diclofenac', 'ingenol mebutate', 'imiquimod'] | due to the comparable efficacy of 3 % diclofenac ingenol mebutate and 3 . 75 % imiquimod in treating ak multiple lesions a pharmacoeconomic evaluation of cost-effectiveness of the three treatments was needed . |
| paperID 529 sentID 7 | ['diclofenac', 'ingenol mebutate', 'imiquimod'] | a cost-efficacy analysis comparing 3 % diclofenac sodium with ingenol mebutate and 3 . 75 % imiquimod was performed . |
| paperID 3207 sentID 22 | ['fluorouracil', 'imiquimod', 'ingenol mebutate', 'diclofenac'] | with multiple lesions the second-line therapy is the use of topical treatments including fluorouracil imiquimod ingenol mebutate and diclofenac [5 ] . |

The table above shows the results from processing the multi-search inputs. The *drug searched* column is a representation of how each drug name that has been fuzzy matched is individually analysed to give its *common name* and *synonym* before extracting documents and sentences that contain either of these drug names. Further, analysis of other drugs found in the sentence is done to extract them and thereafter the sentence column shows the highlighted drug names.
